# Supplementary material
Source: Research Square preprint supplement (doi:10.21203/rs.3.rs-8849413/v1)
Supplement: Supplementary file 1 [file 727f269f182463eb9822e7dc.docx]

**Table S1**: p values and lda scores of groups according to lefse analysis

| bacteria | group | ef_lda | P value |
| --- | --- | --- | --- |
| k__Bacteria|p__Actinobacteriota|c__Actinobacteria|o__Micrococcales|f__Micrococcaceae|g__Rothia|s__Rothia_s__ | CONT | 3,78985957 | 0,03620279 |
| k__Bacteria|p__Spirochaetota|c__Spirochaetia|o__Spirochaetales|f__Spirochaetaceae|g__Treponema|s__Treponema_pedis | CONT | 3,00962774 | 0,02346988 |
| k__Bacteria|p__Proteobacteria|c__Gammaproteobacteria|o__Burkholderiales|f__Neisseriaceae|g__Alysiella | CONT | 2,59213969 | 0,01710443 |
| k__Bacteria|p__Proteobacteria|c__Gammaproteobacteria|o__Burkholderiales|f__Neisseriaceae|g__Alysiella|s__Alysiella_s__ | CONT | 2,42085717 | 0,02892684 |
| k__Bacteria|p__Bacteroidota|c__Bacteroidia|o__Bacteroidales|f__Prevotellaceae|g__Prevotella|s__Prevotella_multisaccharivorax | GAS | 2,97420939 | 0,03375274 |
| k__Bacteria|p__Firmicutes|c__Bacilli|o__Lactobacillales|f__Lactobacillaceae | GAS | 2,87103363 | 0,01209285 |
| k__Bacteria|p__Firmicutes|c__Bacilli|o__Lactobacillales|f__Lactobacillaceae|g__Lactobacillus | GAS | 2,87103363 | 0,01209285 |
| k__Bacteria|p__Bacteroidota|c__Bacteroidia|o__Bacteroidales|f__Bacteroidaceae | GAS | 2,84322048 | 0,02377126 |
| k__Bacteria|p__Bacteroidota|c__Bacteroidia|o__Bacteroidales|f__Bacteroidaceae|g__Bacteroides | GAS | 2,84322048 | 0,02377126 |
| k__Bacteria|p__Firmicutes|c__Bacilli|o__Lactobacillales|f__Lactobacillaceae|g__Lactobacillus|s__Lactobacillus_s__ | GAS | 2,73031836 | 0,03037102 |
| k__Bacteria|p__Desulfobacterota|c__Desulfovibrionia|o__Desulfovibrionales | GAS | 2,71723401 | 0,02712218 |
| k__Bacteria|p__Desulfobacterota|c__Desulfovibrionia | GAS | 2,70589666 | 0,02712218 |
| k__Bacteria|p__Actinobacteriota|c__Actinobacteria|o__Bifidobacteriales | GAS | 2,69180667 | 0,00889588 |
| k__Bacteria|p__Actinobacteriota|c__Actinobacteria|o__Bifidobacteriales|f__Bifidobacteriaceae | GAS | 2,69180667 | 0,00889588 |
| k__Bacteria|p__Fusobacteriota|c__Fusobacteriia|o__Fusobacteriales|f__Leptotrichiaceae|g__Leptotrichia|s__Leptotrichia_shahii | GAS | 2,55433559 | 0,01285191 |
| k__Bacteria|p__Firmicutes|c__Negativicutes|o__Veillonellales-Selenomonadales|f__Veillonellaceae|g__Dialister|s__Dialister_pneumosintes | GAS | 2,54202632 | 0,04445078 |
| k__Bacteria|p__Firmicutes|c__Clostridia|o__Oscillospirales | GAS | 2,48945987 | 0,02941789 |
| k__Bacteria|p__Firmicutes|c__Clostridia|o__Oscillospirales|f__Ruminococcaceae | GAS | 2,30788545 | 0,03265023 |
| k__Bacteria|p__Verrucomicrobiota|c__Verrucomicrobiae|o__Verrucomicrobiales|f__Akkermansiaceae|g__Akkermansia|s__Akkermansia_muciniphila | GAS | 2,20239432 | 0,03675627 |
| k__Bacteria|p__Firmicutes|c__Clostridia|o__Oscillospirales|f__Ruminococcaceae|g__Faecalibacterium|s__Faecalibacterium_s__ | GAS | 2,17076766 | 0,01568953 |
| k__Bacteria|p__Firmicutes|c__Clostridia|o__Oscillospirales|f__Ruminococcaceae|g__Faecalibacterium | GAS | 2,16573778 | 0,01568953 |
| k__Bacteria|p__Verrucomicrobiota | GAS | 2,14764886 | 0,03742187 |
| k__Bacteria|p__Verrucomicrobiota|c__Verrucomicrobiae | GAS | 2,14764886 | 0,03742187 |
| k__Bacteria|p__Verrucomicrobiota|c__Verrucomicrobiae|o__Verrucomicrobiales | GAS | 2,14764886 | 0,03742187 |
| k__Bacteria|p__Verrucomicrobiota|c__Verrucomicrobiae|o__Verrucomicrobiales|f__Akkermansiaceae | GAS | 2,14764886 | 0,03742187 |
| k__Bacteria|p__Verrucomicrobiota|c__Verrucomicrobiae|o__Verrucomicrobiales|f__Akkermansiaceae|g__Akkermansia | GAS | 2,14764886 | 0,03742187 |
| k__Bacteria|p__Actinobacteriota|c__Actinobacteria|o__Bifidobacteriales|f__Bifidobacteriaceae|g__Gardnerella | GAS | 2,0422692 | 0,01413702 |
| k__Bacteria|p__Actinobacteriota|c__Actinobacteria|o__Bifidobacteriales|f__Bifidobacteriaceae|g__Gardnerella|s__Gardnerella_s__ | GAS | 2,04210874 | 0,01413702 |
| k__Bacteria|p__Bacteroidota|c__Bacteroidia|o__Bacteroidales|f__Prevotellaceae|g__Prevotella|s__Prevotellaceae_bacterium | GAS | 2,04032401 | 0,00522487 |
| k__Bacteria|p__Firmicutes|c__Bacilli|o__Erysipelotrichales|f__Erysipelotrichaceae|g__Bulleidia|s__Bulleidia_extructa | GAS | 2,03858266 | 0,0427604 |
| k__Bacteria|p__Firmicutes|c__Bacilli|o__Erysipelotrichales|f__Erysipelotrichaceae|g__Bulleidia | GAS | 2,03767727 | 0,0427604 |

**Table S2**: p values and lda scores of groups according to lefse analysis

| bacteria | group | ef_lda | P value |
| --- | --- | --- | --- |
| k__Bacteria|p__Bacteroidota|c__Bacteroidia|o__Bacteroidales|f__Prevotellaceae|g__Prevotella|s__Prevotella_dentalis | Gin-Control | 2,93253134 | 0,0106345 |
| k__Bacteria|p__Bacteroidota|c__Bacteroidia|o__Bacteroidales|f__Prevotellaceae|g__Prevotella|s__Prevotella_enoeca | Gin-Control | 2,47225982 | 0,01056377 |
| k__Bacteria|p__Firmicutes|c__Negativicutes|o__Veillonellales-Selenomonadales|f__Veillonellaceae|g__Veillonella|s__uncultured_methanogenic | Gin-Gastritis | 3,81195751 | 0,03847351 |
| k__Bacteria|p__Firmicutes|c__Bacilli|o__Lactobacillales|f__Lactobacillaceae | Gin-Gastritis | 2,95296104 | 0,04572127 |
| k__Bacteria|p__Firmicutes|c__Bacilli|o__Lactobacillales|f__Lactobacillaceae|g__Lactobacillus | Gin-Gastritis | 2,95286402 | 0,04572127 |
| k__Bacteria|p__Campilobacterota|c__Campylobacteria|o__Campylobacterales|f__Campylobacteraceae|g__Campylobacter|s__Campylobacter_showae | PH-Control | 3,46810561 | 0,02254272 |
| k__Bacteria|p__Bacteroidota|c__Bacteroidia|o__Bacteroidales|f__Prevotellaceae|g__Prevotella|s__Prevotella_oulorum | PH-Gastritis | 3,48822804 | 0,03662576 |
| k__Bacteria|p__Firmicutes|c__Negativicutes|o__Veillonellales-Selenomonadales|f__Selenomonadaceae|g__Selenomonas|s__Selenomonas_flueggei | PH-Gastritis | 2,31415421 | 0,00855609 |
| k__Bacteria|p__Firmicutes|c__Clostridia|o__Oscillospirales | Stage 1-Gastritis | 2,74031053 | 0,03452791 |
| k__Bacteria|p__Firmicutes|c__Clostridia|o__Peptostreptococcales-Tissierellales|f__Anaerovoracaceae|g__[Eubacterium]_saphenum_group | Stage 1-Gastritis | 2,64994494 | 0,01075235 |
| k__Bacteria|p__Desulfobacterota|c__Desulfovibrionia|o__Desulfovibrionales|f__Desulfomicrobiaceae | Stage 1-Gastritis | 2,63830969 | 0,01011948 |
| k__Bacteria|p__Desulfobacterota|c__Desulfovibrionia|o__Desulfovibrionales|f__Desulfomicrobiaceae|g__Desulfomicrobium | Stage 1-Gastritis | 2,62197906 | 0,01952121 |
| k__Bacteria|p__Desulfobacterota|c__Desulfovibrionia|o__Desulfovibrionales|f__Desulfomicrobiaceae|g__Desulfomicrobium|s__Desulfomicrobium_orale | Stage 1-Gastritis | 2,60962708 | 0,01952121 |
| k__Bacteria|p__Firmicutes|c__Clostridia|o__Oscillospirales|f__Ruminococcaceae|g__Faecalibacterium|s__Faecalibacterium_s__ | Stage 1-Gastritis | 2,6075394 | 0,01952121 |
| k__Bacteria|p__Firmicutes|c__Clostridia|o__Oscillospirales|f__Ruminococcaceae|g__Faecalibacterium | Stage 1-Gastritis | 2,38058088 | 0,04531844 |
| k__Bacteria|p__Proteobacteria|c__Gammaproteobacteria|o__Enterobacterales|f__Enterobacteriaceae|g__Escherichia-Shigella | Stage 1-Gastritis | 2,38056855 | 0,04531844 |
| k__Bacteria|p__Proteobacteria|c__Gammaproteobacteria|o__Enterobacterales|f__Enterobacteriaceae|g__Escherichia-Shigella|s__Escherichia-Shigella_s__ | Stage 1-Gastritis | 2,14462564 | 0,01707982 |
| k__Bacteria|p__Proteobacteria|c__Gammaproteobacteria|o__Enterobacterales|f__Enterobacteriaceae | Stage 1-Gastritis | 2,14267249 | 0,01707982 |
| k__Bacteria|p__Proteobacteria|c__Gammaproteobacteria|o__Enterobacterales | Stage 1-Gastritis | 2,1413417 | 0,01707982 |
| k__Bacteria|p__Firmicutes|c__Bacilli|o__Izemoplasmatales|f__Izemoplasmatales|g__Izemoplasmatales|s__Izemoplasmatales_s__ | Stage 1-Gastritis | 2,14131481 | 0,01707982 |
| k__Bacteria|p__Firmicutes|c__Bacilli|o__Izemoplasmatales | Stage 1-Gastritis | 2,13973629 | 0,01890452 |
| k__Bacteria|p__Firmicutes|c__Bacilli|o__Izemoplasmatales|f__Izemoplasmatales | Stage 1-Gastritis | 2,13498409 | 0,01890452 |
| k__Bacteria|p__Firmicutes|c__Bacilli|o__Izemoplasmatales|f__Izemoplasmatales|g__Izemoplasmatales | Stage 1-Gastritis | 2,13227903 | 0,01890452 |
